# Supplementary material for: STIM1L traps and gates Orai1 channels without remodeling the cortical ER
Source: PubMed Central journal article supplement (PMC4406124; doi:10.1242/jcs.164228), 2015-04-15
Supplement: supp_128.8.1568_JCS164228.pdf [file supp_128.8.1568_JCS164228.pdf]

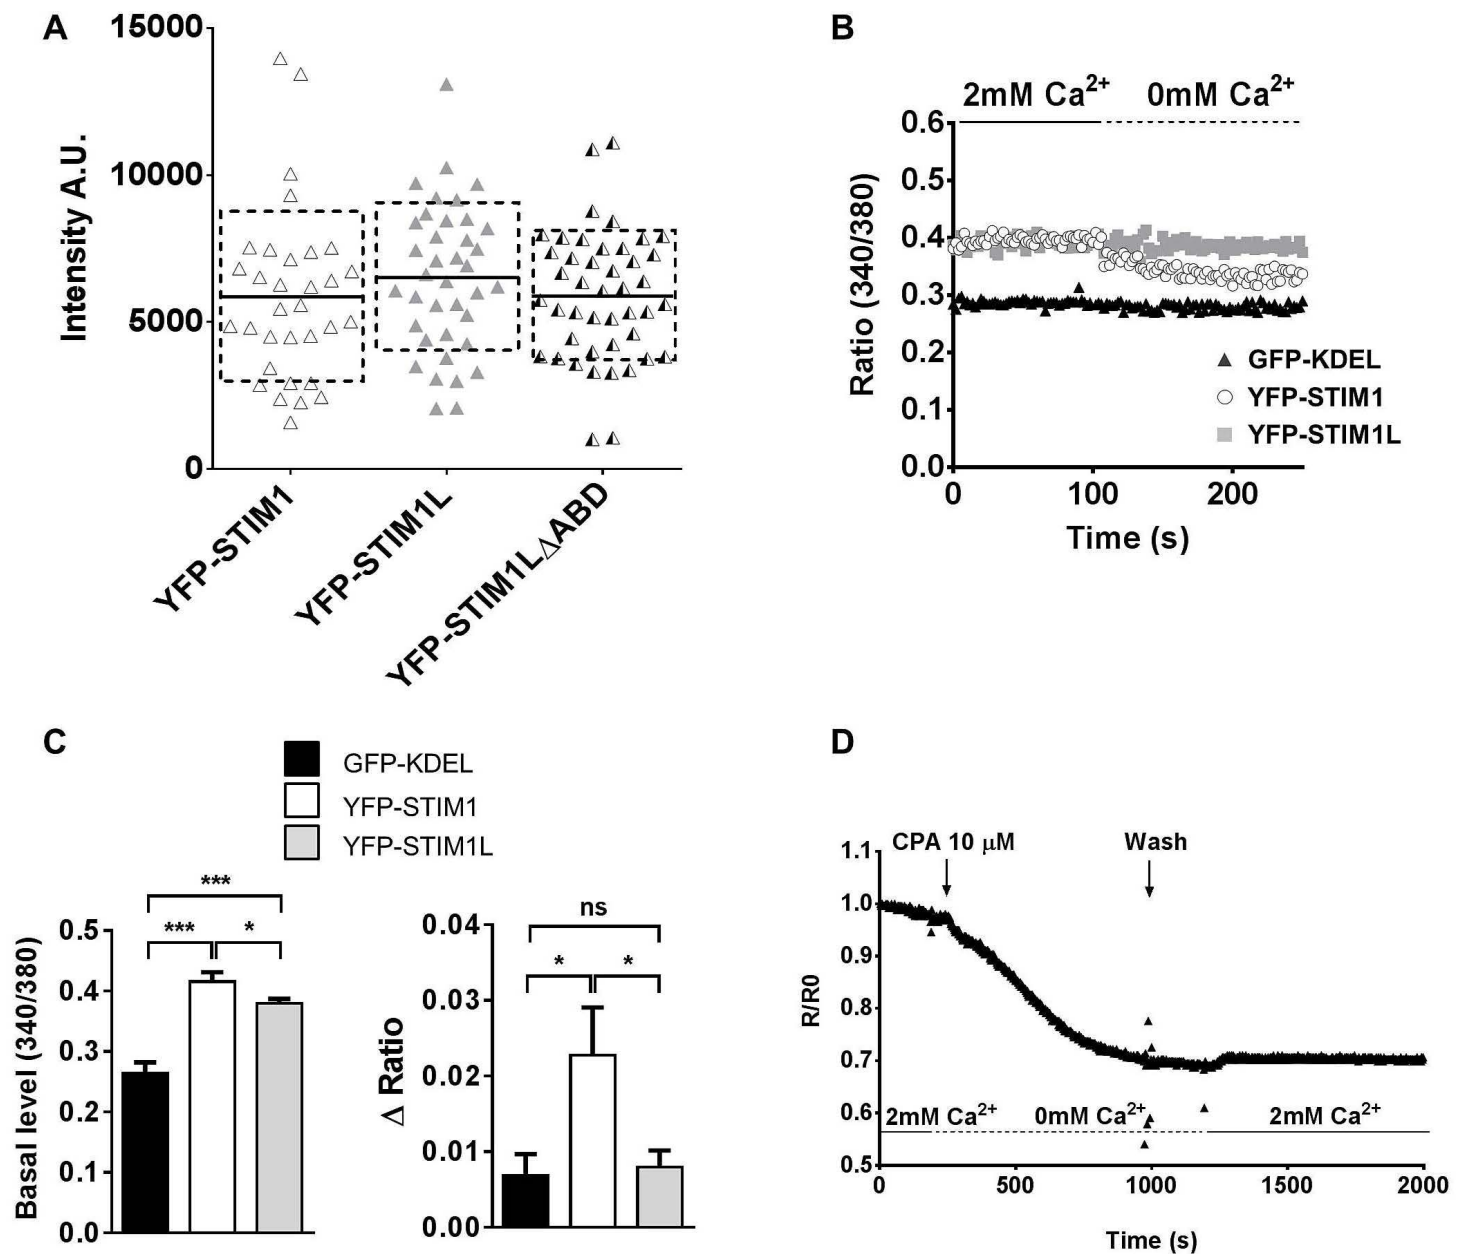

**Figure S1 (related to Fig. 1).** (A) Wide-field intensity of YFP-STIM1, YFP-STIM1L and YFP-STIM1L $\Delta$ ABD expressing cells used for TIRF imaging (n=32/8/3, 38/7/3 and 44/7/3 cells/cover-slips/experiments). Bars show the mean and dashed squares the  $\pm 1$  SD values used as criteria to select cells for quantification of TIRF images. (B) Representative Ca<sup>2+</sup> recordings of DKO cells expressing KDEL-GFP, YFP-STIM1 or YFP-STIM1L during Ca<sup>2+</sup> removal. (C) Statistical evaluation of basal Ca<sup>2+</sup> levels (left) and of Ca<sup>2+</sup> influx (right) (n=14/2/2, 35/9/6 and 51/9/6 cells/cover-slips/experiments). Basal Ca<sup>2+</sup> level was evaluated as the mean ratio value before medium switch, and resting Ca<sup>2+</sup> influx (DRatio) as the amplitude of the Ca<sup>2+</sup> drop upon switching cells from Ca<sup>2+</sup> to Ca<sup>2+</sup> free medium. Unpaired t-test: \*p < 0,05; \*\*p<0,01; \*\*\*p<0,001. All errors bars show SEM. (D) Representative D1<sub>ER</sub> recording of DKO cells expressing a control plasmid during store depletion and refilling. Cells were transiently exposed to CPA in Ca<sup>2+</sup> free medium and 2 mM Ca<sup>2+</sup> added 3 min later to promote store refilling.

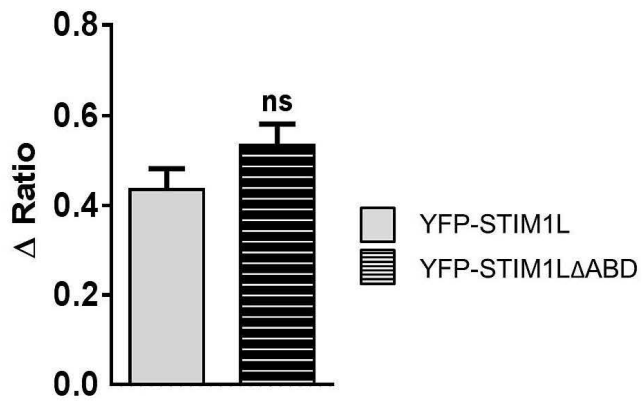

**Figure S2 (related to Fig. 2). STIM1LΔABD mediates SOCE.**

Quantification of the  $\text{Ca}^{2+}$  elevations evoked by  $\text{Ca}^{2+}$  readmission to Tg-treated cells expressing YFP-STIM1L or YFP-STIM1LΔABD (n=23/3/3 and 21/3/3 cells/recordings/transfections; mean±SEM).

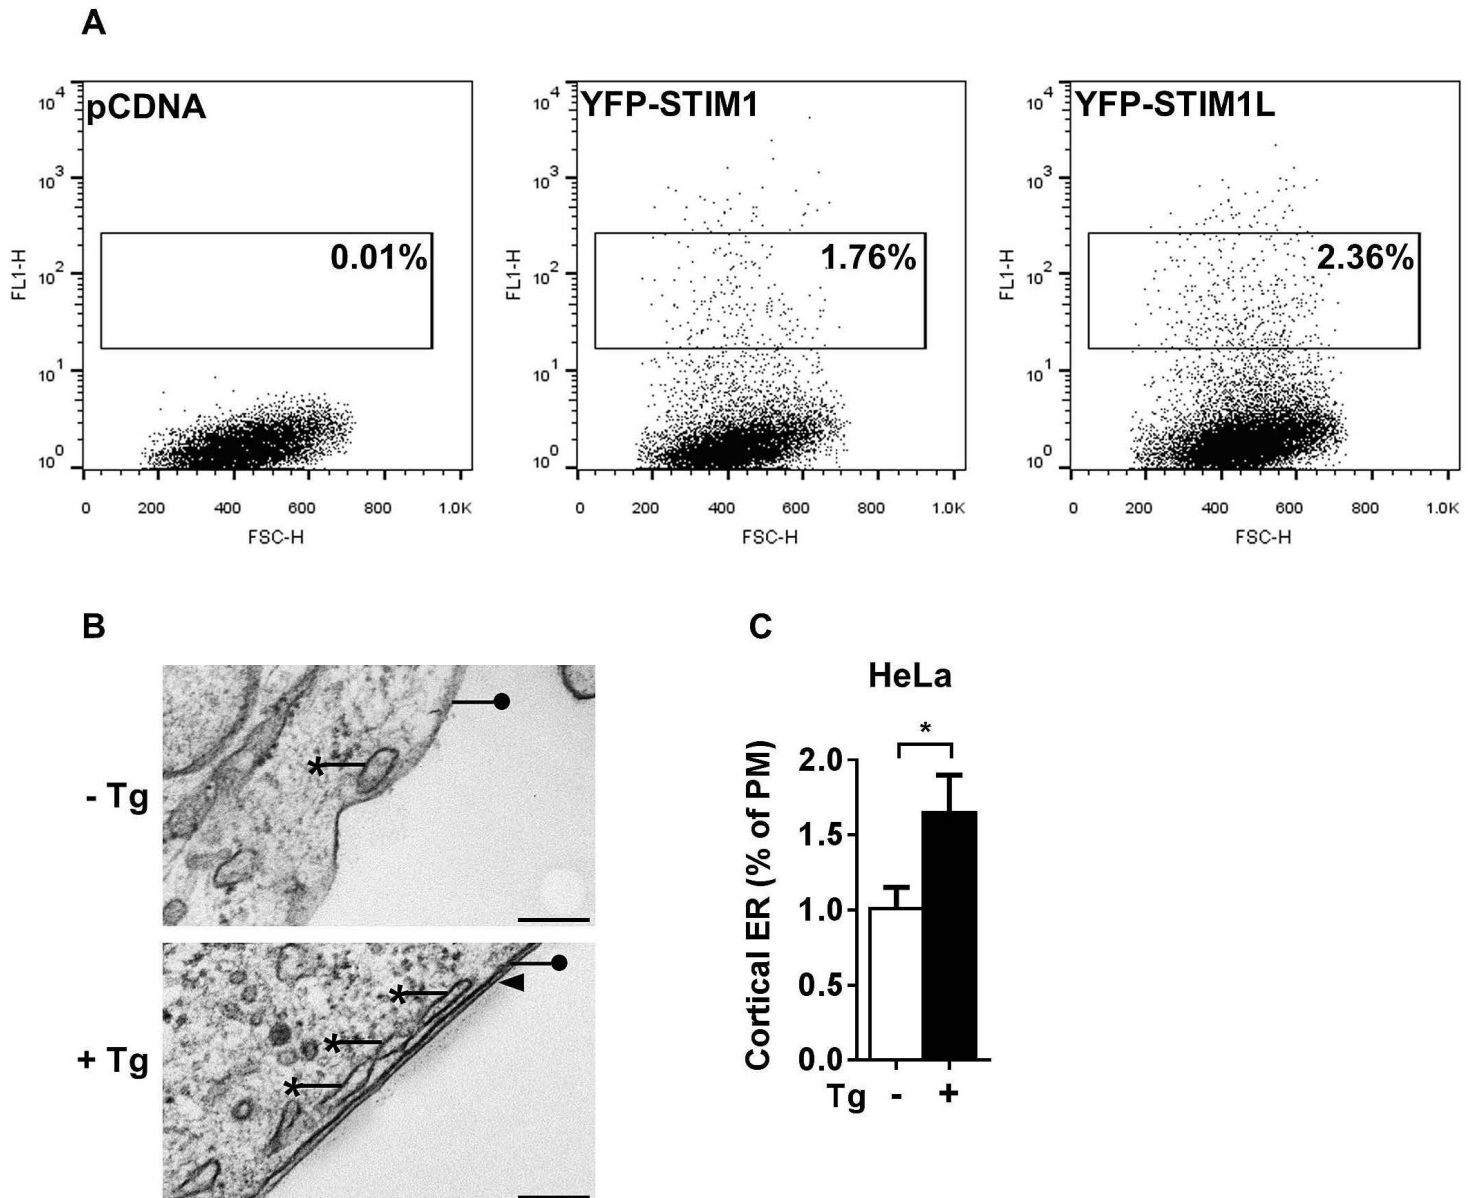

**Figure S3 (related to Fig. 3). Fluorescence-activated cell sorting of YFP expressing cells used for EM and ER remodeling in naïve HeLa cells.** (A) Representative FACS recordings showing the criteria used to select fluorescent cells for EM. (B) Ultra-structural analysis of HeLa cells expressing a plasmid control (pCDNA) before (top) and 10 min after exposure to 1  $\mu$ M Tg (bottom), to assess the endogenous ability of cells to remodel their ER. Images show sheets of cER (asterisks) apposed to the PM (closed circle), and arrowhead denotes the dish bottom. Bar: 200 nm. (C) Percentage of PM decorated by cER before and after addition of Tg (n=38-56 for each condition from 2-3 independent experiments).

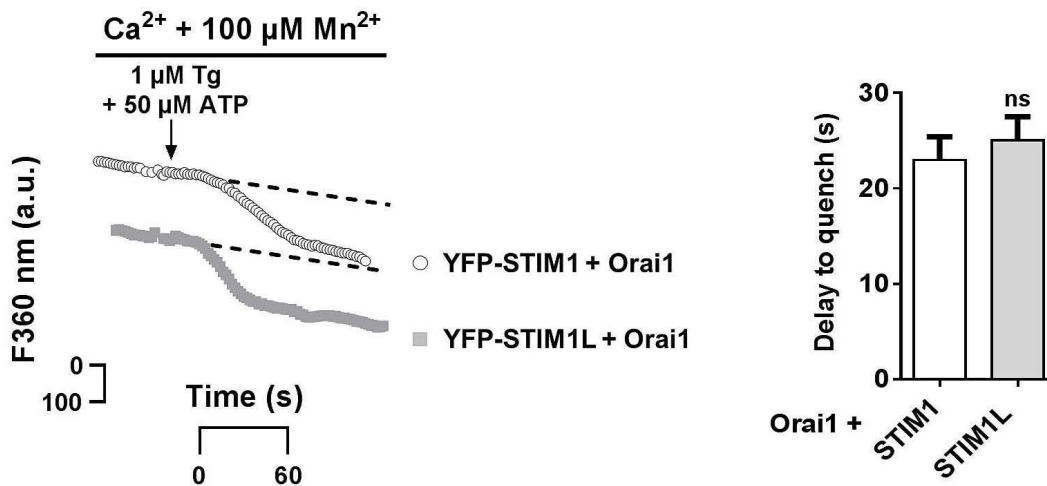

**Figure S4 (related to Fig. 4). Kinetics of SOCE activation following fast ER Ca<sup>2+</sup> depletion.** Representative Mn<sup>2+</sup> quench recordings (left) and quantification (right) of DKO cells co-transfected with Orai1 together with YFP-STIM1 or YFP-STIM1L (n=34/18/4 and 28/10/3 cells/recordings/transfections). Cells were exposed to 100 μM Mn<sup>2+</sup> prior to 50 μM ATP plus 1 μM Tg addition and fura-2 fluorescence quench was measured at 360 nm.
